# Supplementary material
Source: Springer Nature journal article supplement (https://www.springermedizin.de/resource/supplementary/12889_2010_3370_MOESM4_ESM.pdf/9488826)

Distribution of Current  
536 EID Collection Sites

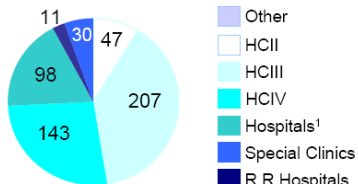

Distribution of Total Volume from  
Collection Sites (since Nov 06)

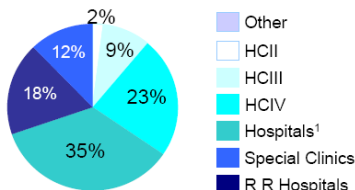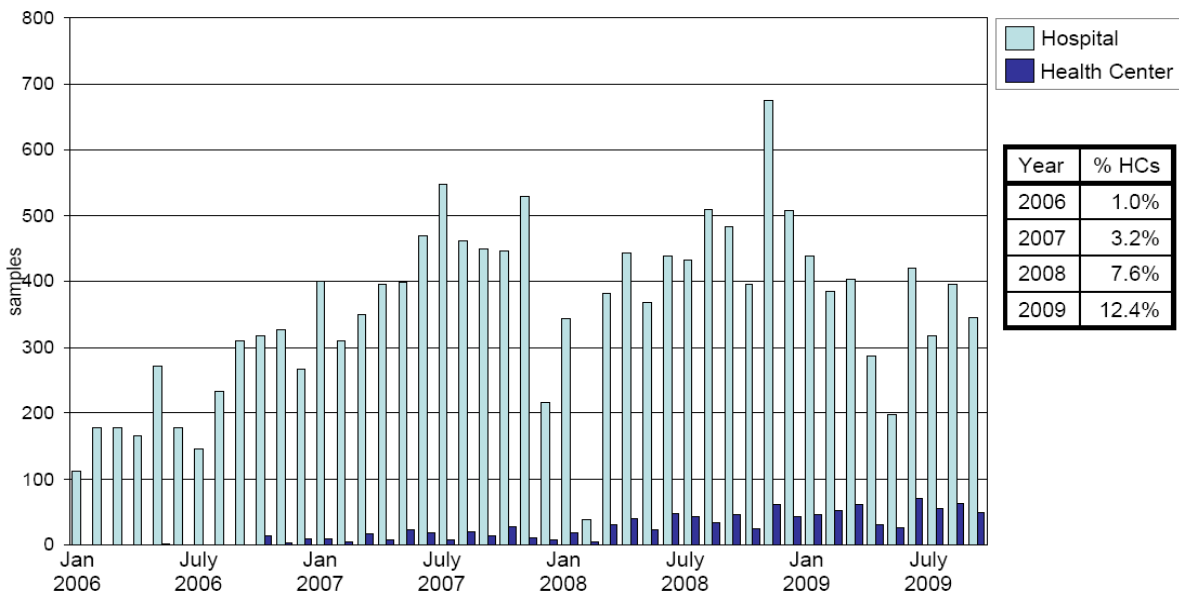

Supplement: MOESM4 [file 9488826]
